# Supplementary material
Source: Elsevier journal article supplement (https://comptes-rendus.academie-sciences.fr/chimie/article/10.1016/j.crci.2008.10.010/file/attach/mmc2.pdf)
Supplement: mmc2 [file mmc2.pdf]

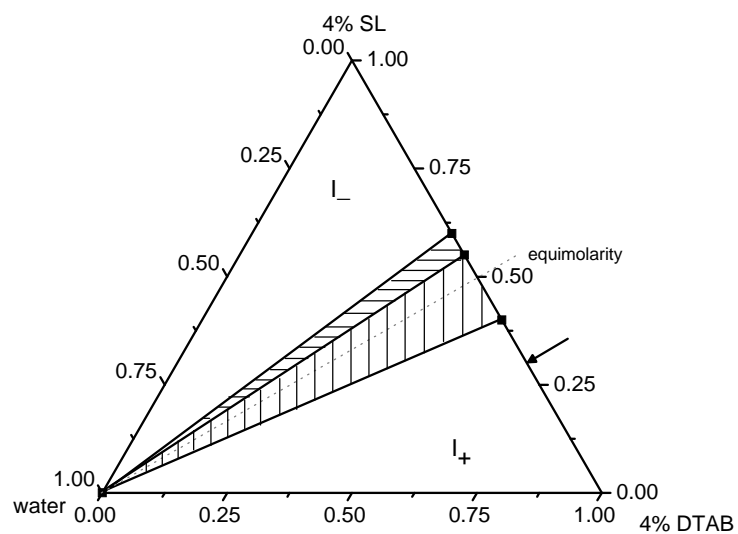

**Figure S2.** Schematic ternary phase diagram of the SL / DTAB system at 25°C (the arrow represents our starting solution (reference sample; mass ratio 30 / 70)).
